# Supplementary material
Source: publisher site journal article supplement (https://www.dovepress.com/article/supplementary_file/535038/%25255B535038%25255D%20Supplementary%20Material_3_1.docx)

**Supplementary Material**

**Device Information for Laboratory Tests**

The laboratory tests for serum biomarker levels were performed using the following methods and instruments:

Hemoglobin: Sodium Dodecyl Sulfate (SLS) colorimetric method with Sysmex XN-9000, manufactured by Sysmex Corporation, Japan.

Potassium and Sodium: Ion-Selective Electrode (ISE) method with Beckman AU5400, manufactured by Beckman Coulter, USA.

Albumin: Bromocresol Purple (BCP) method with Beckman AU5400, manufactured by Beckman Coulter, USA.

Blood Glucose: Glucose Oxidase method with Beckman AU5400, manufactured by Beckman Coulter, USA.

Glycated Hemoglobin: High-Performance Liquid Chromatography (HPLC) with Beckman AU5400, manufactured by Beckman Coulter, USA.

Total Cholesterol, Triglycerides, and Low-Density Lipoprotein (LDL): Colorimetric method with Beckman AU5400, manufactured by Beckman Coulter, USA.

N-terminal Pro-brain Natriuretic Peptide (NT-proBNP): Chemiluminescence method with Roche 601, manufactured by Roche Diagnostics, Germany.

High-Sensitivity C-Reactive Protein (hs-CRP): Immunoturbidimetric method with Beckman AU5400, manufactured by Beckman Coulter, USA.

D-Dimer: Immunoturbidimetric assay with ACL-TOP, manufactured by Instrumentation Laboratory, USA.

**figure S1 ROC Curves of MMSE, SPPB, and Combined Score for Predicting 5-Year All-Cause Mortality**


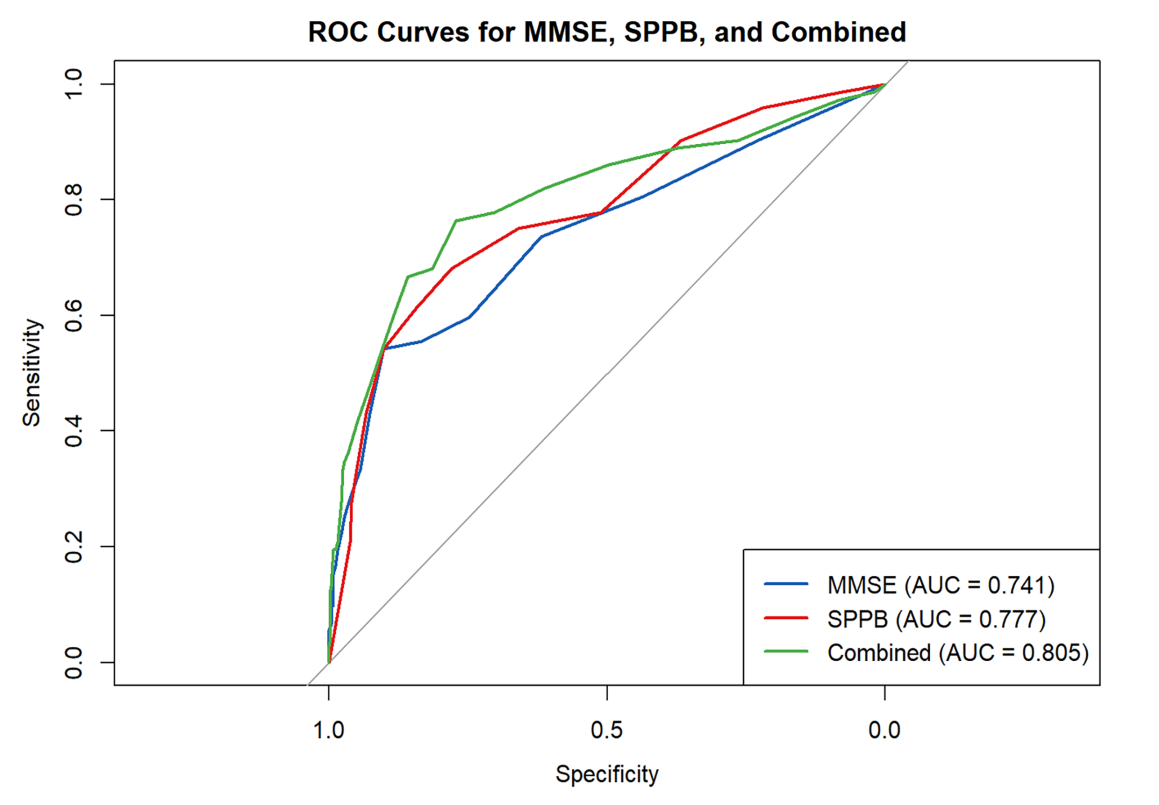

Supplement: Supplementary file 1 [file %25255B535038%25255D%20Supplementary%20Material_3_1.docx]
